1           **Genome-scale phylogeny and contrasting modes of genome evolution in the fungal**  
2                                                           **phylum Ascomycota**

3       Xing-Xing Shen<sup>1,\*</sup>, Jacob L. Steenwyk<sup>2</sup>, Abigail L. LaBella<sup>2</sup>, Dana A. Opulente<sup>3</sup>, Xiaofan  
4       Zhou<sup>4</sup>, Jacek Kominek<sup>3</sup>, Yuanning Li<sup>2</sup>, Marizeth Groenewald<sup>5</sup>, Chris Todd Hittinger<sup>3</sup>, and  
5                                                           Antonis Rokas<sup>2,\*</sup>

6  
7       <sup>1</sup>Institute of Insect Sciences, Ministry of Agriculture Key Lab of Molecular Biology of Crop  
8       Pathogens and Insects, College of Agriculture and Biotechnology, Zhejiang University, Hangzhou  
9       310058, China

10       <sup>2</sup>Department of Biological Sciences, Vanderbilt University, Nashville, TN 37235, USA

11       <sup>3</sup>Laboratory of Genetics, Wisconsin Energy Institute, Center for Genomic Science Innovation, DOE  
12       Great Lakes Bioenergy Research Center, J. F. Crow Institute for the Study of Evolution, University of  
13       Wisconsin-Madison, Madison, WI 53706, USA

14       <sup>4</sup>Guangdong Laboratory for Lingnan Modern Agriculture, Guangdong Province Key Laboratory of  
15       Microbial Signals and Disease Control, Integrative Microbiology Research Centre, South China  
16       Agricultural University, Guangzhou 510642, China

17       <sup>5</sup>Westerdijk Fungal Biodiversity Institute, 3584 CT, The Netherlands

18

19       \*Correspondence: [xingxingshen@zju.edu.cn](mailto:xingxingshen@zju.edu.cn) (XXS) and [antonis.rokas@vanderbilt.edu](mailto:antonis.rokas@vanderbilt.edu) (AR)

20       Keywords: Fungi, evolutionary rate, GC content, phylogenomics, molecular dating, ancestral  
21       state reconstruction, genome evolution, budding yeasts, genome size

## 22 **Abstract**

23 Ascomycota, the largest and best-studied phylum of fungi, contains three subphyla:  
24 Saccharomycotina (budding yeasts), Pezizomycotina (filamentous fungi), and  
25 Taphrinomycotina (fission yeasts); organisms from all three subphyla have been invaluable as  
26 models in diverse fields (e.g., biotechnology, cell biology, genetics, and medicine). Despite  
27 its importance, we still lack a comprehensive genome-scale phylogeny or understanding of  
28 the similarities and differences in the mode of genome evolution within this phylum. To  
29 address these gaps, we examined 1,107 genomes from Saccharomycotina (332),  
30 Pezizomycotina (761), and Taphrinomycotina (14) species to infer the Ascomycota  
31 phylogeny, estimate its timetree, and examine the evolution of key genomic properties. We  
32 inferred a robust genome-wide phylogeny that resolves several contentious relationships and  
33 estimated that the Ascomycota last common ancestor likely originated in the Ediacaran (~563  
34 ± 68 million years ago). Comparisons of genomic properties revealed that Saccharomycotina  
35 and Pezizomycotina, the two taxon-rich subphyla, differed greatly in their genome properties.  
36 Saccharomycotina typically have smaller genomes, lower GC contents, lower numbers of  
37 genes, and higher rates of molecular sequence evolution compared to Pezizomycotina.  
38 Ancestral state reconstruction showed that the genome properties of the Saccharomycotina  
39 and Pezizomycotina last common ancestors were very similar, enabling inference of the  
40 direction of evolutionary change. For example, we found that a lineage-specific acceleration  
41 led to a 1.6-fold higher evolutionary rate in Saccharomycotina, whereas the 10% difference in  
42 GC content between Saccharomycotina and Pezizomycotina genomes stems from a trend  
43 toward AT bases within budding yeasts and toward GC bases within filamentous fungi. These

44 results provide a robust evolutionary framework for understanding the diversification of the  
45 largest fungal phylum.

46 **Main**

47 The fungal phylum Ascomycota is one of most diverse phyla of eukaryotes with ~65,000  
48 known species that represent approximately three quarters of all known species of fungi<sup>1</sup>. The  
49 Ascomycota is divided in three subphyla. The Saccharomycotina subphylum is a lineage of  
50 more than 1,000 known species and 12 major clades<sup>2</sup>; commonly referred to as budding  
51 yeasts. Species in this lineage include the model organism *Saccharomyces cerevisiae*<sup>3</sup> and  
52 several notable pathogens, such as the human commensal *Candida albicans*<sup>4</sup> and the  
53 multidrug-resistant emerging pathogen *Candida auris*<sup>5</sup>. The Pezizomycotina subphylum  
54 contains more than 63,000 described species in 13 classes<sup>6</sup>; commonly referred to as  
55 filamentous fungi. This subphylum contains several major plant and animal pathogens  
56 belonging to diverse genera, such as *Fusarium*, *Aspergillus*, *Zymoseptoria*, and  
57 *Magnaporthe*<sup>7-10</sup>. Finally, the Taphrinomycotina subphylum contains ~140 described species  
58 in 5 classes<sup>6</sup>; commonly referred to as fission yeasts. This subphylum contains the model  
59 organism *Schizosaccharomyces pombe* and the human pathogen *Pneumocystis jirovecii*<sup>11,12</sup>.

60

61 To better understand the evolution of species diversity and ecological lifestyles in  
62 Ascomycota fungi, a robust framework of phylogenetic relationships and divergence time  
63 estimates is essential. In the last two decades, several studies have aimed to infer the  
64 Ascomycota phylogeny, either using a handful of gene markers from hundreds of taxa<sup>13-17</sup> or  
65 using hundreds of gene markers from tens of taxa<sup>18-21</sup>. To date, the most comprehensive  
66 “few-markers-from-many-taxa” phylogeny used a 6-gene, 420-taxon (8 Taphrinomycotina,  
67 16 Saccharomycotina, and 396 Pezizomycotina) data matrix<sup>13</sup>, whereas the most

68 comprehensive genome-scale phylogeny used an 238-gene, 496-taxon (12 Taphrinomycotina,  
69 76 Saccharomycotina, and 408 Pezizomycotina) data matrix<sup>22</sup> but was inferred using  
70 FastTree, a program that is faster but typically yields phylogenies that have much lower  
71 likelihood scores than those obtained by IQ-TREE and RAxML/RAxML-NG<sup>23</sup>. Key  
72 relationships supported by these studies include the monophyly of each subphylum and class  
73 and the sister group relationship of subphyla Saccharomycotina and Pezizomycotina. In  
74 contrast, relationships among classes are contentious between studies, particularly with  
75 respect to relationships between the 13 classes in Pezizomycotina<sup>6</sup>. For example, there is  
76 disagreement whether the sister group to the rest of classes in the Pezizomycotina is class  
77 Pezizomycetes<sup>14</sup>, class Orbiliomycetes<sup>17</sup>, or a clade comprised of both<sup>19</sup>.

78

79 Previous molecular clock-based estimates of divergence times for Ascomycota have all been  
80 based on few-markers-from-many-taxa data matrices<sup>14,15,24-26</sup>, resulting in age estimates for  
81 key events in Ascomycota evolution that have wide intervals. For example, analysis of a 6-  
82 gene, 121-taxon (1 Saccharomycotina, 118 Pezizomycotina, and 2 Taphrinomycotina) data  
83 matrix inferred that the origin of the phylum Ascomycota took place 531 million years ago  
84 (mya) (95% credibility interval (CI): 671-410 mya) (see their Scenario 4 in Table 3)<sup>15</sup>, while  
85 analysis of a 4-gene, 145-taxon (12 Saccharomycotina, 129 Pezizomycotina, and 4  
86 Taphrinomycotina) data matrix inferred that the phylum originated 588 mya (95% CI: 773-  
87 487 mya)<sup>14</sup>. More importantly, the sparser taxon sampling of previous studies has prevented  
88 estimation of divergence times of several key divergence events of higher taxonomic ranks<sup>24-</sup>

89 <sup>26</sup> and stymied our understanding of their evolutionary pace. While these studies have  
90 significantly advanced our understanding of Ascomycota evolution, a comprehensive,  
91 genome-scale phylogeny and timetree stemming from the sampling of hundreds of genes  
92 from thousands of taxa from the phylum are still lacking.

93

94 A robust phylogenomic framework would also facilitate comparisons of genome evolution  
95 across the subphyla of Ascomycota. For example, the three subphyla differ in their genome  
96 sizes, with the genomes of Pezizomycotina species being notably larger (~42 Mb) than those  
97 of Saccharomycotina (~13 Mb) and Taphrinomycotina (~14 Mb)<sup>27</sup>. While several recent  
98 studies have analyzed major lineages within the two taxon-rich subphyla,  
99 Saccharomycotina<sup>2,20,28</sup> and Pezizomycotina<sup>29-31</sup>, comparisons of genome evolution across  
100 the two subphyla are lacking. For example, a recent analysis of the tempo and mode of  
101 genome evolution in 332 Saccharomycotina found evidence of high evolutionary rates and  
102 reductive evolution across this subphylum<sup>2</sup>, but whether budding yeasts are faster evolving  
103 than filamentous fungi remains unknown. However, a recent analysis of 71 Ascomycota  
104 genomes showed that Pezizomycotina have much higher levels of gene order divergence than  
105 Saccharomycotina<sup>21</sup>. Similarly, genome-wide examinations of horizontal gene transfer events  
106 in dozens to more than a hundred Ascomycota genomes have revealed that Pezizomycotina  
107 acquired significantly higher numbers of genes from prokaryotic donors than  
108 Saccharomycotina<sup>32,33</sup>. Although these studies have contributed to our understanding of  
109 certain evolutionary processes in the phylum, we still know relatively little about the

110 evolution of Ascomycota genomes and their properties.

111

112 There are currently more than one thousand genomes from Ascomycota species that are  
113 publicly available, which span the diversity of Saccharomycotina (332 genomes representing  
114 all 12 major clades), Pezizomycotina (761 genomes representing 9 / 13 classes), and  
115 Taphrinomycotina (14 genomes representing 4 / 5 classes) (1,107 genomes as of December  
116 14, 2018). These 1,107 genomes represent a much larger and representative source of  
117 genomic data across the entire Ascomycota phylum than previously available, providing a  
118 unique opportunity to infer a genome-scale phylogeny and timetree for the entire subphylum  
119 and compare the mode of genome evolution across its subphyla.

120

## 121 **Results and Discussion**

### 122 **A genome-scale phylogeny of the fungal phylum Ascomycota**

123 To infer a genome-scale phylogeny of Ascomycota fungi, we employed 1,107 publicly  
124 available genomes from species belonging to Ascomycota (Saccharomycotina: 332;  
125 Pezizomycotina: 761; Taphrinomycotina: 14) and six outgroups from the sister fungal phylum  
126 Basidiomycota. All genomes were retrieved from the NCBI GenBank database, ensuring that  
127 only one genome per species was included (Supplementary Tables 1 and 2). Analysis of  
128 genome assembly completeness reveals that 1,021/1,113 (~92%) genomes have more than  
129 90% of the 1,315 full-length BUSCO genes<sup>34</sup> (Supplementary Fig. 1).

130

131 1,315 BUSCO genes from 1,107 Ascomycota fungi and six outgroups were used to construct  
132 a phylogenomic data matrix (see Methods). After constructing the multiple amino acid  
133 sequence alignment and trimming ambiguous regions for each of these 1,315 BUSCO genes,  
134 we kept only the 815 BUSCO genes that had taxon occupancy of  $\geq 50\%$  for each subphylum  
135 (i.e.,  $\geq 7$  Taphrinomycotina,  $\geq 166$  Saccharomycotina, and  $\geq 381$  Pezizomycotina) and whose  
136 amino acid sequence alignments were  $\geq 300$  sites in length. In the final set of 815 BUSCO  
137 genes, alignment lengths range from 300 to 4,585 amino acid sites (average = 690) and  
138 numbers of taxa range from 851 to 1,098 (average = 1,051) (Supplementary Table 3). The  
139 final data matrix contains 1,107 taxa, 815 genes, and 562,376 amino acid sites.

140

141 Inference using concatenation- and coalescent-based approaches yielded a robust,  
142 comprehensive phylogeny of the Ascomycota phylum (Fig. 1). The vast majority of  
143 internodes in both the concatenation-based (1,103 / 1,110; 99%) and the coalescent-based  
144 phylogeny (1,076 / 1,110; 97%) received strong ( $\geq 95\%$ ) support and were congruent  
145 between the phylogenies inferred using the two approaches; only 46 / 1,110 (4%) internodes  
146 were incongruent between the two phylogenies (Supplementary Figs. 2 and 3).

147

148 Our higher-level phylogeny of Ascomycota is generally more congruent with previous  
149 genome-scale phylogenies<sup>2,18,19,35</sup> than with few-genes-from-many-taxa phylogenies<sup>13-16</sup>,  
150 particularly with respect to relationships among the nine classes in the subphylum  
151 Pezizomycotina. For example, genome-scale studies, including ours, consistently favor a



152 clade consisting of Pezizomycetes and Orbiliomycetes as the sister group to the rest of the  
153 Pezizomycotina<sup>18,19</sup>, while studies based on a few genes recovered either Orbiliomycetes<sup>15–17</sup>  
154 or Pezizomycetes<sup>14</sup> as the sister class to the rest of the Pezizomycotina (Fig. 2a). Our  
155 phylogeny also strongly supported the placement of the class Schizosaccharomycetes, which  
156 includes the model organism *Schizosaccharomyces pombe*, as the sister group to the class  
157 Pneumocystidomycetes, which contains the human pathogen *Pneumocystis jirovecii* (Fig.  
158 2b). Interestingly, a recent genome-scale study of 84 fungal genomes showed that our result is  
159 consistent with the phylogeny inferred using an alignment-free composition vector approach  
160 but not with the phylogeny inferred using maximum likelihood, which instead recovered  
161 Schizosaccharomycetes as the sister group to Taphrinomycetes<sup>18</sup>. Finally, both concatenation-  
162 and coalescent-based approaches supported the placement of the subphylum  
163 Saccharomycotina as the sister group to the subphylum Pezizomycotina (Figs. 1 and 2c). This  
164 result is consistent with most previous studies that analyze multiple sequence alignment  
165 data<sup>16,18,20,36–38</sup>, but not with a recent study that analyzed genomic data with an alignment-free  
166 method and placed the subphylum Saccharomycotina as the sister group to the subphylum  
167 Taphrinomycotina<sup>39</sup>.

168

169 To evaluate whether our genome-scale data matrix robustly resolved the three historically  
170 contentious branches discussed in the previous paragraph, we quantified the distribution of  
171 phylogenetic signal for alternative topologies of these three phylogenetic hypotheses at the  
172 level of genes and sites using a maximum likelihood framework presented by Shen et al.<sup>40</sup>.

173 First, we found that phylogenetic support for each of the three branches stemmed from many  
174 genes, i.e., it was not dominated by a small number of genes with highly disproportionate  
175 influence (Supplementary Table 4). Second, we found that the topology recovered by both  
176 concatenation- and coalescent-based approaches in our study had significantly the highest  
177 frequencies of supporting genes and supporting sites ( $G$ -test), ranging from 0.45 to 0.65, in  
178 all three branches examined (Fig. 2a-c, Supplementary Tables 4 and 5). Importantly, none of  
179 two alternative conflicting phylogenetic hypotheses for each of the three branches received  
180 frequencies of supporting genes and supporting sites that were equal or greater than 1/3  
181 (0.33), the value expected if the relationships among the taxa were represented by a  
182 polytomy. The very small fraction of branches where concatenation- and coalescent-based  
183 inference conflicted (<5%) and the robust support of individual genes and sites for specific  
184 historically contentious branches (Fig. 2a-c) suggest that the coupling of genome-scale  
185 amounts of data and comprehensive taxon sampling will provide robust resolution to major  
186 lineages of the tree of life<sup>2,41</sup>.

187

### 188 **A genome-scale evolutionary timetree of the fungal phylum Ascomycota**

189 We next used the robust phylogeny, a relaxed molecular clock approach, and six widely  
190 accepted time calibration nodes (see Methods), to infer the timescale of evolution of  
191 Ascomycota. We inferred the origin of the phylum to have taken place 563 million years ago  
192 (mya) (95% credibility interval (CI): 631–495 mya); the origin of the subphylum  
193 Saccharomycotina 438.4 mya (CI: 590–304 mya); the origin of the subphylum

194 Pezizomycotina 407.7 mya (CI: 631–405 mya); and the origin of Taphrinomycotina crown  
195 group 530.5 mya (CI: 620–417 mya). Notably, the taxonomic placement of all budding yeasts  
196 into a single class, Saccharomycetes, whose origin coincides with the origin of the  
197 subphylum Saccharomycotina, means that the last common ancestor of this sole class of  
198 budding yeasts is much more ancient than those of any of the 9 classes (based on current  
199 taxon sampling) in the subphylum Pezizomycotina (Supplementary Fig. 4 and Supplementary  
200 Table 6). For example, the most ancient class in Pezizomycotina is Pezizomycetes, whose  
201 origin is dated 247.7 mya (CI: 475-193 mya) (Supplementary Fig. 4 and Supplementary Table  
202 6). The other outlier, albeit with much larger confidence intervals, is class Neolectomycetes  
203 in Taphrinomycotina, which we estimate to have originated 480.4 mya (CI: 607-191 mya)  
204 (Supplementary Fig. 4 and Supplementary Table 6).

205

206 Comparison of our inferred dates of divergence to those of a recent study using a 4-gene,  
207 145-taxon data matrix<sup>14</sup> shows that our estimates are younger (563 vs 588 mya for  
208 Ascomycota and 408 vs 458 mya for Pezizomycotina; sparser taxon sampling in the previous  
209 study prevents comparison of dates for Saccharomycotina and Taphrinomycotina). This result  
210 is consistent with findings of previous studies<sup>42,43</sup>, where inclusion of large numbers of genes  
211 was found to also result in younger estimates of divergence times, perhaps because of the  
212 influence of larger amounts of data in decreasing the stochastic error involved in date  
213 estimation. In summary, generation of a genome-scale timetree for more than 1,000  
214 ascomycete species spanning the diversity of the phylum provides a robust temporal

215 framework for understanding and exploring the origin and diversity of Ascomycota

216 lifestyles<sup>44</sup>.

217

### 218 **Contrasting modes of genome evolution in fungal phylum Ascomycota**

219 To begin understanding the similarities and differences in the modes of genome evolution

220 between subphyla, we focused on examining the evolution of seven different genomic

221 properties between Saccharomycotina (332 taxa) and Pezizomycotina (761 taxa), the two

222 most taxon-rich subphyla in Ascomycota (Fig. 3). Specifically, we found that

223 Saccharomycotina exhibited a 1.6-fold higher evolutionary rate (on average, 1.80

224 substitutions per site in Saccharomycotina vs. 1.12 substitutions per site in Pezizomycotina),

225 1.24-fold lower GC content (40% vs. 50%), 3-fold smaller genome size (13 Mb vs. 39 Mb),

226 1.9-fold lower number of protein-coding genes (5,734 vs. 10,847), 1.3-fold lower number of

227 DNA repair genes (41 vs. 54), 1.2-fold higher number of tRNA genes (179 vs. 146), and 1.3-

228 fold smaller estimates of non-synonymous to synonymous substitution rate ratio ( $d_N/d_S$ )

229 (0.053 vs. 0.063), compared to Pezizomycotina (Fig. 3a, Table 1, and Supplementary Table

230 7).

231

232 Analysis of standard Pearson's correlations among the seven genomic properties revealed that

233 two pairs exhibited statistically significant contrasting patterns between Saccharomycotina

234 and Pezizomycotina. Specifically, evolutionary rate shows negative correlation with GC

235 content in Saccharomycotina but positive correlation in Pezizomycotina and GC content

236 shows negative correlation with number of DNA repair genes in Saccharomycotina but  
237 positive correlation in Pezizomycotina (Fig. 3b). These correlations are largely consistent  
238 before (i.e., standard Pearson's correlations) and after (i.e., phylogenetically independent  
239 contrasts) accounting for correlations due to phylogeny (Supplementary Table 8).

240

241 For each of the seven properties, we used our genome-scale phylogeny (Fig. 1) to infer the  
242 ancestral character states and reconstruct their evolution in the Saccharomycotina ancestor  
243 and the Pezizomycotina ancestor. Comparison of ancestral states along branches on the  
244 Saccharomycotina part of the phylogeny to those on the Pezizomycotina part of the  
245 phylogeny shown that all genomic properties, except the number of tRNA genes, exhibited  
246 different modes of evolution (Fig. 4 and Table 1). For example, most Saccharomycotina  
247 branches exhibit evolutionary rates of at least 1.0 amino acid substitutions / site, whereas  
248 those of Pezizomycotina exhibit evolutionary rates between 0.7 and 1.4 substitutions / site  
249 (Fig. 4a). However, the inferred values for these properties in the Saccharomycotina last  
250 common ancestor and in the Pezizomycotina last common ancestor nodes are quite similar.  
251 For example, the inferred state values for the Saccharomycotina last common ancestor and  
252 the Pezizomycotina last common ancestor are 1.1 and 0.9 substitutions / site for evolutionary  
253 rate and 43% and 47% for GC content (Table 1), respectively. Interestingly, the same trends  
254 are also observed across lineages, such as Lipomycetaceae, which is the sister group to the  
255 rest of the Saccharomycotina, and the clade consisting of Pezizomycetes and Orbiliomycetes,  
256 which is the sister group to the rest of the Pezizomycotina (Fig. 4a and b).

257

258 Comparison of the trait values for the seven genome properties between extant  
259 Saccharomycotina and Pezizomycotina branches to those of the Saccharomycotina and  
260 Pezizomycotina last common ancestors showed that evolutionary rate, GC content, genome  
261 size, and number of protein-coding genes were the properties with the highest amounts of  
262 evolutionary change (Figs. 3 and 4, Table 1). Ancestral state reconstruction also enabled  
263 inference of the direction of evolutionary change for each of the evolutionary properties. For  
264 example, the Saccharomycotina and Pezizomycotina last common ancestors, as well as  
265 branches in Lipomycetaceae and branches across Pezizomycotina, exhibit similar  
266 evolutionary rates, whereas the rest of the nodes and branches in the Saccharomycotina part  
267 of the phylogeny exhibit much higher evolutionary rates. This pattern suggests that the higher  
268 levels of genomic diversity in Saccharomycotina stem from an acceleration of evolutionary  
269 rate that occurred within the subphylum, after the divergence of Lipomycetaceae from the  
270 rest of the Saccharomycotina (Fig. 4a and b).

271

272 Why do Saccharomycotina exhibit higher evolutionary rates compared to Pezizomycotina?  
273 Studies in other lineages, such as vertebrate<sup>45</sup> and invertebrate<sup>46</sup> animals, have previously  
274 shown that evolutionary rate is positively associated with generation time. Assuming that  
275 mutation rates are equal, species with shorter generation times will replicate their genomes  
276 more frequently, accruing more mutations per unit time. While the generation times of most  
277 fungi in our phylogeny are unknown, the generation times of model organisms in

278 Saccharomycotina are thought to be shorter than those in Pezizomycotina. For example, the  
279 doubling time of the budding yeasts *S. cerevisiae* and *C. albicans* under optimal conditions is  
280 90 min<sup>47,48</sup>, while that of the filamentous fungi *Aspergillus nidulans* and *Neurospora crassa* is  
281 between 2-3 hours<sup>49,50</sup>. An alternative but not mutually exclusive explanation may be that  
282 Saccharomycotina have, on average, 13 fewer DNA repair genes (41) than Pezizomycotina  
283 (54) (Fig. 3 and Table 1), since it is well established that absence or loss of DNA repair genes  
284 increase mutation rates<sup>51-53</sup>. The lower numbers of DNA repair genes in budding yeasts, but  
285 not their higher evolutionary rate, was also recently reported in a recent analysis of 328  
286 ascomycete proteomes by Milo et al.<sup>54</sup>. Finally, other life-history traits (e.g., smaller cell size,  
287 faster metabolism, and larger population size) that have been associated with variation in the  
288 rate of molecular evolution<sup>55</sup> might also contribute to higher evolutionary rates of the  
289 Saccharomycotina.

290

291 Variation in genomic GC content has historically been of broad interest in biology<sup>56</sup>. Average  
292 GC content values of different genomic regions (e.g., intergenic regions, protein-coding  
293 regions) in Saccharomycotina are consistently lower than those in Pezizomycotina  
294 (Supplementary Fig. 5). Similarly, gene-wise average estimates of GC content showed that all  
295 815 BUSCO genes in Saccharomycotina have lower GC content values than those in  
296 Pezizomycotina (Supplementary Fig. 6). Moreover, we found that the frequencies of amino  
297 acids encoded by GC-rich codons in Saccharomycotina are much lower than those of amino  
298 acids encoded by GC-rich codons in Pezizomycotina (Supplementary Fig. 7). Ancestral state

299 reconstruction of genomic GC content along branches on the phylogeny shows that the  
300 Saccharomycotina and Pezizomycotina last common ancestors, as well as branches in  
301 Lipomycetaceae and branches in classes Pezizomycetes and Orbiliomycetes, exhibit  
302 intermediate GC content around 45%. In contrast, GC content of most branches within the  
303 rest of Saccharomycotina (i.e., all major clades of Saccharomycotina, including extant taxa,  
304 except Lipomycetaceae) evolved toward 40%, while GC content within the rest of  
305 Pezizomycotina (i.e., all classes, including extant taxa, except Pezizomycetes and  
306 Orbiliomycetes) evolved toward 50%. This pattern suggests that the evolution of lower levels  
307 of GC content in Saccharomycotina occurred after the divergence of Lipomycetaceae from  
308 the rest of Saccharomycotina and that the evolution of higher levels of GC content in  
309 Pezizomycotina occurred after the divergence of the clade consisting of Pezizomycetes and  
310 Orbiliomycetes from the rest of Pezizomycotina (Fig. 4a and b).

311

312 Why are Pezizomycotina genomes more GC-rich compared to Saccharomycotina genomes?  
313 There are two possible explanations. The first one is that mutational biases have skewed the  
314 composition of Saccharomycotina genomes toward AT content<sup>57</sup>. For example, Steenwyk et  
315 al. showed that *Hanseniaspora* budding yeasts with higher AT content lost a greater number  
316 of DNA repair genes than those with lower AT content<sup>53</sup>, suggesting that the loss of DNA  
317 repair genes is associated with AT richness. Consistent with these results, we found that  
318 Pezizomycotina genomes contain a higher number of DNA repair genes than  
319 Saccharomycotina (Fig. 3 and Table 1). The second potential, not necessarily mutually



320 exclusive, explanation is that mutational biases have skewed Pezizomycotina genomes  
321 toward GC richness. It was recently shown that increasing GC-biased gene conversion  
322 (gBGC), a process associated with recombination that favors the transmission of GC alleles  
323 over AT alleles<sup>58</sup>, can result in a systematic underestimate of  $d_N/d_S$  in birds<sup>59</sup>. If this is true for  
324 Ascomycota, due to the higher GC content of Pezizomycotina genomes, we would expect  
325 that their  $d_N/d_S$  would be underestimated due to the higher levels of gBGC compared to  
326 Saccharomycotina. Consistent with this expectation, by calculating differences in  $d_N/d_S$   
327 before and after accounting for gBGC across 815 codon-based BUSCO genes, we found that  
328 the underestimate of  $d_N/d_S$  in Pezizomycotina is 2-fold higher than that in Saccharomycotina  
329 (Pezizomycotina: average of differences in  $d_N/d_S = 0.004$ ; Saccharomycotina: average of  
330 differences in  $d_N/d_S = 0.002$ ) (Supplementary Fig. 8).

331

## 332 **Concluding Remarks**

333 In this study, we took advantage of the recent availability of the genome sequences of 1,107  
334 Ascomycota species from Saccharomycotina (332), Pezizomycotina (761), and  
335 Taphrinomycotina (14) to infer a genome-scale phylogeny and timetree for the entire phylum  
336 and compare the mode of genome evolution across its subphyla. Leveraging genome-scale  
337 amounts of data from the most comprehensive taxon set to date enabled us to test the  
338 robustness of our inference for several contentious branches, potentially resolving  
339 controversies surrounding key higher-level relationships within the Ascomycota phylum. For  
340 example, our study robustly supported Saccharomycotina as the sister group to

341 Pezizomycotina and a clade comprised of classes Pezizomycetes and Orbiliomycetes as the  
342 sister group to the rest of the Pezizomycotina. Our first genome-scale timetree suggests the  
343 last common ancestor of Ascomycota likely originated in the Ediacaran period. Examination  
344 of mode of genome evolution revealed that Saccharomycotina, which contains the single  
345 currently described class Saccharomycetes, and Pezizomycotina, which contains 13 classes,  
346 exhibited greatly contrasting evolutionary processes for seven genomic properties, in  
347 particular for evolutionary rate, GC content, and genome size. Our results provide a robust  
348 evolutionary framework for understanding the diversification of the largest fungal phylum.  
349

## 350 **Methods**

### 351 **Data collection**

352 To collect the greatest possible set of genome representatives of the phylum Ascomycota as  
353 of 14 December, 2018, we first retrieved the 332 publicly available Saccharomycotina yeast  
354 genomes (<https://doi.org/10.6084/m9.figshare.5854692>) from a recent comprehensive  
355 genomic study of the Saccharomycotina yeasts<sup>2</sup>. We then used “Pezizomycotina” and  
356 “Taphrinomycotina” as search terms in NCBI’s Genome Browser  
357 (<https://www.ncbi.nlm.nih.gov/genome/browse#!/eukaryotes/Ascomycota>) to obtain the basic  
358 information of strain name, assembly accession number, assembly release date, assembly  
359 level (e.g., contig, scaffold, etc.), and GenBank FTP access number for draft genomes from  
360 the subphyla Pezizomycotina and Taphrinomycotina, respectively. For species with multiple  
361 isolates sequenced, we only included the genome of the isolate with the highest assembly  
362 level and the latest release date. We next downloaded genome assemblies from GenBank data  
363 via FTP access number (<ftp://ftp.ncbi.nlm.nih.gov/genomes/>). Collectively, we included 332  
364 species representing all 12 major clades of the subphylum Saccharomycotina<sup>2</sup>, 761 species  
365 representing 9 / 13 classes of the subphylum Pezizomycotina<sup>1,6</sup>, and 14 species representing 4  
366 / 5 classes of the subphylum Taphrinomycotina<sup>1,6</sup>. Finally, we used the genomes of six  
367 representatives of the phylum Basidiomycota as outgroups. Detailed information of  
368 taxonomy and source of the 1,113 genomes in our study is provided in Supplementary Tables  
369 1 and 2.

370

371 **Assessment of genome assemblies and phylogenomic data matrix construction**

372 To assess the quality of each of the 1,113 genome assemblies, we used the Benchmarking  
373 Universal Single-Copy Orthologs (BUSCO), version 3.0.2<sup>34</sup>. Each assembly's completeness  
374 was assessed based on the presence / absence of a set of 1,315 predefined orthologs (referred  
375 to as BUSCO genes) from 75 genomes in the OrthoDB Version 9 database<sup>60</sup> from the  
376 Ascomycota database, as described previously<sup>28,61</sup>. In brief, for each BUSCO gene, its  
377 consensus orthologous protein sequence among the 75 reference genomes was used as query  
378 in a tBLASTn search against each genome to identify up to three putative genomic regions,  
379 and the gene structure of each putative genomic region was predicted by AUGUSTUS v  
380 3.2.2<sup>62</sup>. Next, the sequences of these predicted genes were aligned to the HMM-profile of the  
381 BUSCO gene. BUSCO genes in a given genome assembly were considered as single-copy,  
382 “full-length” if there was only one complete predicted gene present in the genome,  
383 duplicated, “full-length” if there were two or more complete predicted genes present in the  
384 genome, “fragmented” if the predicted gene was shorter than 95% of the aligned sequence  
385 lengths from the 75 reference species, and “missing” if there was no predicted gene present in  
386 the genome.

387

388 To construct the phylogenomic data matrix, we started with the set of 1,315 single-copy, full-  
389 length BUSCO genes from 1,107 representatives of the phylum Ascomycota and six  
390 outgroups. For each BUSCO gene, we first translated nucleotide sequences into amino acid  
391 sequences, taking into account the different usage of the CUG codon in Saccharomycotina<sup>2,63</sup>.

392 Next, we aligned the amino acid sequences using MAFFT v7.299b<sup>64</sup> with the options “--  
393 thread 4 --auto --maxiterate 1000” and trimmed amino acid alignments using the trimAl  
394 v1.4.rev15<sup>65</sup> with the options “-gappyout -colnumbering”. We mapped the nucleotide  
395 sequences on the trimmed amino acid alignment based on the column numbers in the original  
396 alignment and to generate the trimmed codon-based nucleotide alignment. Finally, we  
397 removed BUSCO gene alignments whose taxon occupancy (i.e., percentage of taxa whose  
398 sequences were present in the trimmed amino acid alignment) was < 50% for each  
399 subphylum (i.e., < 7 Taphrinomycotina, < 166 Saccharomycotina, and < 381 Pezizomycotina)  
400 or whose trimmed alignment length was < 300 amino acid sites. These filters resulted in the  
401 retention of 815 BUSCO gene alignments, each of which had  $\geq 50\%$  taxon occupancy for  
402 each subphylum and alignment length  $\geq 300$  amino acid sites.

403

#### 404 **Phylogenetic analysis**

405 For each of 815 BUSCO genes, we first inferred its best-fitting amino acid substitution model  
406 using IQ-TREE multi-thread version 1.6.8<sup>66</sup> with options “-m TEST -mrate G4” with the  
407 Bayesian information criterion (BIC). We then inferred best-scoring maximum likelihood  
408 (ML) gene tree under 10 independent tree searches using IQ-TREE. The detailed parameters  
409 for running each gene were kept in log files (see the Figshare repository). We inferred the  
410 concatenation-based ML tree using IQ-TREE on a single node with 32 logical cores under a  
411 single “LG +G4” model with the options “-seed 668688 -nt 32 -mem 220G -m LG+G4 -bb  
412 1000”, as 404 out of 815 genes favored “LG +G4”<sup>67,68</sup> as best-fitting model (see  
413 Supplementary Table 3). We also inferred the coalescent-based species phylogeny with

414 ASTRAL-III version 4.10.2<sup>69,70</sup> using the set of 815 individual ML gene trees. The reliability  
415 of each internal branch was evaluated using 1,000 ultrafast bootstrap replicates<sup>71</sup> and local  
416 posterior probability<sup>72</sup>, in the concatenation- and coalescence-based species trees,  
417 respectively. We visualized phylogenetic trees using the R package *ggtree* v1.10.5<sup>73</sup>.  
418  
419 We used the non-Bayesian RelTime method, as implemented in the command line version of  
420 MEGA7<sup>74</sup> to estimate divergence times. The very large size of our data matrix, both in terms  
421 of genes as well as in terms of taxa, prohibited the use of computationally much more  
422 demanding methods, such as the Bayesian MCMCTree method<sup>75,76</sup>. The concatenation-based  
423 ML tree with branch lengths was used as the input tree. Six time calibration nodes, which  
424 were retrieved from the TimeTree database<sup>77</sup>, were used for molecular dating analyses: the  
425 *Saccharomyces cerevisiae* – *Saccharomyces uvarum* split (14.3 mya – 17.94 mya), the  
426 *Saccharomyces cerevisiae* - *Kluyveromyces lactis* split (103 mya – 126 mya), the  
427 *Saccharomyces cerevisiae* - *Candida albicans* split (161 mya – 447 mya), the origin of the  
428 subphylum Saccharomycotina (304 mya – 590 mya), the *Saccharomyces cerevisiae* –  
429 *Saitoella complicata* split (444 mya – 631 mya), and the origin of the subphylum  
430 Pezizomycotina (at least 400 mya) based on the *Paleopyrenomycites devonicus* fossil<sup>78</sup>.

431

#### 432 **Examination of seven genome properties**

433 As the subphylum Taphrinomycotina (No. species = 14) has a much smaller number of  
434 species than the subphylum Saccharomycotina (No. species = 332) and the subphylum  
435 Pezizomycotina (No. species = 761) in our dataset, we focused our analyses on the

436 comparisons of seven genome properties (evolutionary rate, GC content, genome size,  
437 number of genes, number of DNA repair genes, number of tRNA genes, and  $d_N/d_S$ ) between  
438 Saccharomycotina and Pezizomycotina. Specifically, for a given taxon, 1) evolutionary rate is  
439 a sum of path distances from the most common ancestor of the subphyla Saccharomycotina  
440 and Pezizomycotina to its tip on the concatenation-based ML tree (Fig. 1); 2) GC content is  
441 the percentage of guanine-cytosine nucleotides in genome; 3) genome size is the total number  
442 of base pairs in genome in megabases (Mb); 4) number of genes is the number of protein-  
443 coding genes in genome. The gene structure was predicted with AUGUSTUS v3.3.1<sup>79</sup> on  
444 *Aspergillus fumigatus* and *Saccharomyces cerevisiae* S288C trained models for  
445 Pezizomycotina and Saccharomycotina, respectively; 5) number of DNA repair genes was  
446 estimated by counting the number of unique protein-coding genes with GO terms related to  
447 DNA repair using InterProScan version 5<sup>80</sup>; 6) number of tRNA genes is the number of tRNA  
448 genes inferred to be present using the tRNAscan-SE 2.0 program<sup>81</sup>; and 7)  $d_N/d_S$  was  
449 estimated by calculating the average of the ratio of the expected numbers of non-synonymous  
450 ( $d_N$ ) and synonymous substitutions ( $d_S$ ) across 815 trimmed codon-based BUSCO gene  
451 alignments under the YN98 (F3X4)<sup>82</sup> codon model and the free ratio model using bppml and  
452 MapNH in the bio++ libraries<sup>83</sup>, following the study by Bolívar et al.<sup>59</sup>.

453

#### 454 **Statistical analyses**

455 All statistical analyses were performed in R v. 3.4.2 (R core team 2017). Pearson's correlation  
456 coefficient was used to test for correlations among seven variables. To account for phylogenetic  
457 relationships of species in correlation analysis, we used the R package ape v5.1<sup>84</sup> in order to

458 compute phylogenetically independent contrasts following the method described by

459 Felsenstein<sup>85</sup>.

460

#### 461 **Ancestral state reconstruction**

462 To reconstruct ancestral character states for each of seven continuous properties, we used the

463 R package phytools v0.6.44 function *contMap*<sup>86</sup> to infer ancestral character states across

464 internal nodes using the maximum likelihood method with the function *fastAnc* and to

465 interpolate the states along each edge using equation [2] of Felsenstein<sup>85</sup>. The input tree was

466 derived from the concatenation-based ML with branch lengths, which was then pruned to

467 keep the 1,093 taxa from the subphyla Pezizomycotina and Saccharomycotina.

468

#### 469 **Data availability**

470 All genome assemblies and proteomes are publicly available in the Zenodo repository:

471 <https://doi.org/10.5281/zenodo.3783970>. Multiple sequence alignments, phylogenetic trees,

472 trait ancestral character state reconstructions, log files, R codes, and custom Perl scripts are

473 available on the figshare repository (<https://doi.org/10.6084/m9.figshare.12196149>;

474 <https://figshare.com/articles/>

475 [Phylogenomics\\_and\\_contrasting\\_modes\\_of\\_genome\\_evolution\\_in\\_Ascomycota/12196149](https://doi.org/10.6084/m9.figshare.12196149) –

476 please note that this link will become active upon publication).



## 477 **References**

- 478 1. Heitman, J. *et al.* *The Fungal Kingdom*. (ASM Press, 2017).
- 479 2. Shen, X.-X. *et al.* Tempo and Mode of Genome Evolution in the Budding Yeast  
480 Subphylum. *Cell* **175**, 1533–1545 (2018).
- 481 3. Peter, J. *et al.* Genome evolution across 1,011 *Saccharomyces cerevisiae* isolates.  
482 *Nature* **556**, 339–344 (2018).
- 483 4. Odds, F. C., Brown, A. J. P. & Gow, N. A. R. *Candida albicans* genome sequence: a  
484 platform for genomics in the absence of genetics. *Genome Biol.* **5**, 230 (2004).
- 485 5. Sharma, C., Kumar, N., Pandey, R., Meis, J. F. & Chowdhary, A. Whole genome  
486 sequencing of emerging multidrug resistant *Candida auris* isolates in India  
487 demonstrates low genetic variation. *New Microbes New Infect.* **13**, 77–82 (2016).
- 488 6. Spatafora, J. W. *et al.* The Fungal Tree of Life: from Molecular Systematics to  
489 Genome-Scale Phylogenies. *Microbiol. Spectr.* **5**, (2017).
- 490 7. Ma, L.-J. *et al.* Comparative genomics reveals mobile pathogenicity chromosomes in  
491 *Fusarium*. *Nature* **464**, 367–373 (2010).
- 492 8. Plissonneau, C., Hartmann, F. E. & Croll, D. Pangenome analyses of the wheat  
493 pathogen *Zymoseptoria tritici* reveal the structural basis of a highly plastic eukaryotic  
494 genome. *BMC Biol.* **16**, 5 (2018).
- 495 9. Dean, R. A. *et al.* The genome sequence of the rice blast fungus *Magnaporthe grisea*.  
496 *Nature* **434**, 980–986 (2005).
- 497 10. Rokas, A., Mead, M. E., Steenwyk, J. L., Oberlies, N. H. & Goldman, G. H. Evolving  
498 moldy murderers: *Aspergillus* section *Fumigati* as a model for studying the repeated

- 499 evolution of fungal pathogenicity. *PLOS Pathog.* **16**, e1008315 (2020).
- 500 11. Wood, V. *et al.* The genome sequence of *Schizosaccharomyces pombe*. *Nature* **415**,  
501 871–880 (2002).
- 502 12. Ma, L. *et al.* Genome analysis of three *Pneumocystis* species reveals adaptation  
503 mechanisms to life exclusively in mammalian hosts. *Nat. Commun.* **7**, 10740 (2016).
- 504 13. Schoch, C. L. *et al.* The Ascomycota Tree of Life: A Phylum-wide Phylogeny  
505 Clarifies the Origin and Evolution of Fundamental Reproductive and Ecological Traits.  
506 *Syst. Biol.* **58**, 224–239 (2009).
- 507 14. Beimforde, C. *et al.* Estimating the Phanerozoic history of the Ascomycota lineages:  
508 Combining fossil and molecular data. *Mol. Phylogenet. Evol.* **77**, 307–319 (2014).
- 509 15. Prieto, M. & Wedin, M. Dating the Diversification of the Major Lineages of  
510 Ascomycota (Fungi). *PLoS One* **8**, e65576 (2013).
- 511 16. James, T. Y. *et al.* Reconstructing the early evolution of Fungi using a six-gene  
512 phylogeny. *Nature* **443**, 818–822 (2006).
- 513 17. Spatafora, J. W. *et al.* A five-gene phylogeny of Pezizomycotina. *Mycologia* **98**, 1018–  
514 1028 (2006).
- 515 18. McCarthy, C. G. P. & Fitzpatrick, D. A. Multiple Approaches to Phylogenomic  
516 Reconstruction of the Fungal Kingdom. in *Advances in Genetics* 211–266 (Elsevier  
517 Inc., 2017).
- 518 19. Nagy, L. G. & Szöllősi, G. Fungal Phylogeny in the Age of Genomics: Insights Into  
519 Phylogenetic Inference From Genome-Scale Datasets. in *Advances in Genetics* 49–72

- 520 (2017).
- 521 20. Riley, R. *et al.* Comparative genomics of biotechnologically important yeasts. *Proc.*  
522 *Natl. Acad. Sci. USA* **113**, 9882–9887 (2016).
- 523 21. Rajeh, A., Lv, J. & Lin, Z. Heterogeneous rates of genome rearrangement contributed  
524 to the disparity of species richness in Ascomycota. *BMC Genomics* **19**, 282 (2018).
- 525 22. Higgins, S. A., Schadt, C. W., Matheny, P. B. & Löffler, F. E. Phylogenomics Reveal  
526 the Dynamic Evolution of Fungal Nitric Oxide Reductases and Their Relationship to  
527 Secondary Metabolism. *Genome Biol. Evol.* **10**, 2474–2489 (2018).
- 528 23. Zhou, X., Shen, X.-X., Hittinger, C. T. & Rokas, A. Evaluating Fast Maximum  
529 Likelihood-Based Phylogenetic Programs Using Empirical Phylogenomic Data Sets.  
530 *Mol. Biol. Evol.* **35**, 486–503 (2018).
- 531 24. Taylor, J. W. & Berbee, M. L. Dating divergences in the Fungal Tree of Life: review  
532 and new analyses. *Mycologia* **98**, 838–849 (2006).
- 533 25. Padovan, A. C. B., Sanson, G. F. O., Brunstein, A. & Briones, M. R. S. Fungi  
534 Evolution Revisited: Application of the Penalized Likelihood Method to a Bayesian  
535 Fungal Phylogeny Provides a New Perspective on Phylogenetic Relationships and  
536 Divergence Dates of Ascomycota Groups. *J. Mol. Evol.* **60**, 726–735 (2005).
- 537 26. Gueidan, C., Ruibal, C., de Hoog, G. S. & Schneider, H. Rock-inhabiting fungi  
538 originated during periods of dry climate in the late Devonian and middle Triassic.  
539 *Fungal Biol.* **115**, 987–996 (2011).
- 540 27. Stajich, J. E. Fungal Genomes and Insights into the Evolution of the Kingdom.

- 541        *Microbiol. Spectr.* **5**, (2017).
- 542    28.    Shen, X.-X. *et al.* Reconstructing the Backbone of the Saccharomycotina Yeast  
543        Phylogeny Using Genome-Scale Data. *G3 Genes|Genomes|Genetics* **6**, 3927–3939  
544        (2016).
- 545    29.    Kjærboelling, I. *et al.* A comparative genomics study of 23 *Aspergillus* species from  
546        section Flavi. *Nat. Commun.* **11**, 1106 (2020).
- 547    30.    Haridas, S. *et al.* 101 *Dothideomycetes* genomes: A test case for predicting lifestyles  
548        and emergence of pathogens. *Stud. Mycol.* **96**, 141–153 (2020).
- 549    31.    Okagaki, L. H., Sailsbery, J. K., Eyre, A. W. & Dean, R. A. Comparative genome  
550        analysis and genome evolution of members of the magnaporthaceae family of fungi.  
551        *BMC Genomics* **17**, 135 (2016).
- 552    32.    Marcet-Houben, M. & Gabaldón, T. Acquisition of prokaryotic genes by fungal  
553        genomes. *Trends Genet.* **26**, 5–8 (2010).
- 554    33.    Wisecaver, J. H., Slot, J. C. & Rokas, A. The Evolution of Fungal Metabolic  
555        Pathways. *PLoS Genet.* **10**, e1004816 (2014).
- 556    34.    Waterhouse, R. M. *et al.* BUSCO Applications from Quality Assessments to Gene  
557        Prediction and Phylogenomics. *Mol. Biol. Evol.* **35**, 543–548 (2018).
- 558    35.    Wang, H., Xu, Z., Gao, L. & Hao, B. A fungal phylogeny based on 82 complete  
559        genomes using the composition vector method. *BMC Evol. Biol.* **9**, 195 (2009).
- 560    36.    Naranjo-Ortiz, M. A. & Gabaldón, T. Fungal evolution: diversity, taxonomy and  
561        phylogeny of the Fungi. *Biol. Rev.* **94**, 2101–2137 (2019).

- 562 37. Floudas, D. *et al.* The Paleozoic Origin of Enzymatic Lignin Decomposition  
563 Reconstructed from 31 Fungal Genomes. *Science* **336**, 1715–1719 (2012).
- 564 38. Robbertse, B., Reeves, J. B., Schoch, C. L. & Spatafora, J. W. A phylogenomic  
565 analysis of the Ascomycota. *Fungal Genet. Biol.* **43**, 715–725 (2006).
- 566 39. Choi, J. & Kim, S.-H. A genome Tree of Life for the Fungi kingdom. *Proc. Natl.*  
567 *Acad. Sci. USA* 201711939 (2017).
- 568 40. Shen, X.-X., Hittinger, C. T. & Rokas, A. Contentious relationships in phylogenomic  
569 studies can be driven by a handful of genes. *Nat. Ecol. Evol.* **1**, 0126 (2017).
- 570 41. One Thousand Plant Transcriptomes Initiative. One thousand plant transcriptomes and  
571 the phylogenomics of green plants. *Nature* **574**, 679–685 (2019).
- 572 42. Shen, X.-X. *et al.* Enlarged Multilocus Data set Provides Surprisingly Younger Time  
573 of Origin for the Plethodontidae, the Largest Family of Salamanders. *Syst. Biol.* **65**,  
574 66–81 (2016).
- 575 43. Liu, L. *et al.* Genomic evidence reveals a radiation of placental mammals  
576 uninterrupted by the KPg boundary. *Proc. Natl. Acad. Sci. USA* **114**, E7282–E7290  
577 (2017).
- 578 44. Hedges, S. B., Marin, J., Suleski, M., Paymer, M. & Kumar, S. Tree of life reveals  
579 clock-like speciation and diversification. *Mol. Biol. Evol.* **32**, 835–845 (2015).
- 580 45. Welch, J. J., Bininda-Emonds, O. R. & Bromham, L. Correlates of substitution rate  
581 variation in mammalian protein-coding sequences. *BMC Evol. Biol.* **8**, 53 (2008).
- 582 46. Thomas, J. A., Welch, J. J., Lanfear, R. & Bromham, L. A Generation Time Effect on

- 583 the Rate of Molecular Evolution in Invertebrates. *Mol. Biol. Evol.* **27**, 1173–1180  
584 (2010).
- 585 47. Salari, R. & Salari, R. Investigation of the Best *Saccharomyces cerevisiae* Growth  
586 Condition. *Electron. physician* **9**, 3592–3597 (2017).
- 587 48. London, R. *et al.* An Automated System for Rapid Non-Destructive Enumeration of  
588 Growing Microbes. *PLoS One* **5**, e8609 (2010).
- 589 49. TRINCI, A. P. J. A Kinetic Study of the Growth of *Aspergillus nidulans* and Other  
590 Fungi. *J. Gen. Microbiol.* **57**, 11–24 (1969).
- 591 50. Gillie, O. J. Growth of *Neurospora crassa* in Unstirred Liquid Cultures. *J. Gen.*  
592 *Microbiol.* **51**, 179–184 (1968).
- 593 51. Tubbs, A. & Nussenzweig, A. Endogenous DNA Damage as a Source of Genomic  
594 Instability in Cancer. *Cell* **168**, 644–656 (2017).
- 595 52. Lang, G. I., Parsons, L. & Gammie, A. E. Mutation Rates, Spectra, and Genome-Wide  
596 Distribution of Spontaneous Mutations in Mismatch Repair Deficient Yeast. *G3*  
597 *Genes|Genomes|Genetics* **3**, 1453–1465 (2013).
- 598 53. Steenwyk, J. L. *et al.* Extensive loss of cell-cycle and DNA repair genes in an ancient  
599 lineage of bipolar budding yeasts. *PLOS Biol.* **17**, e3000255 (2019).
- 600 54. Milo, S., Misgav, R. H., Hazkani-Covo, E. & Covo, S. Limited DNA repair gene  
601 repertoire in Ascomycete yeast revealed by comparative genomics. *Genome Biol. Evol.*  
602 **11**, 3409–3423 (2019).
- 603 55. Bromham, L. The genome as a life-history character: why rate of molecular evolution

- 604 varies between mammal species. *Philos. Trans. R. Soc. B Biol. Sci.* **366**, 2503–2513  
605 (2011).
- 606 56. Šmarda, P. *et al.* Ecological and evolutionary significance of genomic GC content  
607 diversity in monocots. *Proc. Natl. Acad. Sci. USA* **111**, E4096–E4102 (2014).
- 608 57. Zhu, Y. O., Siegal, M. L., Hall, D. W. & Petrov, D. A. Precise estimates of mutation  
609 rate and spectrum in yeast. *Proc. Natl. Acad. Sci. USA* **111**, E2310–E2318 (2014).
- 610 58. Liu, H. *et al.* Tetrad analysis in plants and fungi finds large differences in gene  
611 conversion rates but no GC bias. *Nat. Ecol. Evol.* **2**, 164–173 (2018).
- 612 59. Bolívar, P., Guéguen, L., Duret, L., Ellegren, H. & Mugal, C. F. GC-biased gene  
613 conversion conceals the prediction of the nearly neutral theory in avian genomes.  
614 *Genome Biol.* **20**, 5 (2019).
- 615 60. Zdobnov, E. M. *et al.* OrthoDB v9.1: cataloging evolutionary and functional  
616 annotations for animal, fungal, plant, archaeal, bacterial and viral orthologs. *Nucleic  
617 Acids Res.* **45**, D744–D749 (2017).
- 618 61. Steenwyk, J. L., Shen, X.-X., Lind, A. L., Goldman, G. H. & Rokas, A. A Robust  
619 Phylogenomic Time Tree for Biotechnologically and Medically Important Fungi in the  
620 Genera *Aspergillus* and *Penicillium*. *MBio* **10**, 1–25 (2019).
- 621 62. Stanke, M. & Waack, S. Gene prediction with a hidden Markov model and a new  
622 intron submodel. *Bioinformatics* **19 Suppl 2**, ii215–ii225 (2003).
- 623 63. Krassowski, T. *et al.* Evolutionary instability of CUG-Leu in the genetic code of  
624 budding yeasts. *Nat. Commun.* **9**, 1887 (2018).

- 625 64. Katoh, K. & Standley, D. M. MAFFT multiple sequence alignment software version 7:  
626 Improvements in performance and usability. *Mol. Biol. Evol.* **30**, 772–780 (2013).
- 627 65. Capella-Gutierrez, S., Silla-Martinez, J. M. & Gabaldon, T. trimAl: a tool for  
628 automated alignment trimming in large-scale phylogenetic analyses. *Bioinformatics*  
629 **25**, 1972–1973 (2009).
- 630 66. Nguyen, L.-T., Schmidt, H. A., von Haeseler, A. & Minh, B. Q. IQ-TREE: A Fast and  
631 Effective Stochastic Algorithm for Estimating Maximum-Likelihood Phylogenies.  
632 *Mol. Biol. Evol.* **32**, 268–274 (2015).
- 633 67. Le, S. Q. & Gascuel, O. An improved general amino acid replacement matrix. *Mol.*  
634 *Biol. Evol.* **25**, 1307–1320 (2008).
- 635 68. Yang, Z. Maximum likelihood phylogenetic estimation from DNA sequences with  
636 variable rates over sites: Approximate methods. *J. Mol. Evol.* **39**, 306–314 (1994).
- 637 69. Mirarab, S. *et al.* ASTRAL: genome-scale coalescent-based species tree estimation.  
638 *Bioinformatics* **30**, i541–i548 (2014).
- 639 70. Zhang, C., Rabiee, M., Sayyari, E. & Mirarab, S. ASTRAL-III: polynomial time  
640 species tree reconstruction from partially resolved gene trees. *BMC Bioinformatics* **19**,  
641 153 (2018).
- 642 71. Minh, B. Q., Nguyen, M. A. T. & von Haeseler, A. Ultrafast Approximation for  
643 Phylogenetic Bootstrap. *Mol. Biol. Evol.* **30**, 1188–1195 (2013).
- 644 72. Sayyari, E. & Mirarab, S. Fast Coalescent-Based Computation of Local Branch  
645 Support from Quartet Frequencies. *Mol. Biol. Evol.* **33**, 1654–1668 (2016).



- 646 73. Yu, G., Smith, D. K., Zhu, H., Guan, Y. & Lam, T. T.-Y. ggtree: an r package for  
647 visualization and annotation of phylogenetic trees with their covariates and other  
648 associated data. *Methods Ecol. Evol.* **8**, 28–36 (2017).
- 649 74. Kumar, S., Stecher, G. & Tamura, K. MEGA7: Molecular Evolutionary Genetics  
650 Analysis Version 7.0 for Bigger Datasets. *Mol. Biol. Evol.* **33**, 1870–1874 (2016).
- 651 75. Mello, B., Tao, Q., Tamura, K. & Kumar, S. Fast and Accurate Estimates of  
652 Divergence Times from Big Data. *Mol. Biol. Evol.* **34**, 45–50 (2017).
- 653 76. Yang, Z. PAML 4: phylogenetic analysis by maximum likelihood. *Mol. Biol. Evol.* **24**,  
654 1586–1591 (2007).
- 655 77. Kumar, S., Stecher, G., Suleski, M. & Hedges, S. B. TimeTree: A Resource for  
656 Timelines, Timetrees, and Divergence Times. *Mol. Biol. Evol.* **34**, 1812–1819 (2017).
- 657 78. Taylor, T. N., Hass, H., Kerp, H., Krings, M. & Hanlin, R. T. Perithecial ascomycetes  
658 from the 400 million year old Rhynie chert: an example of ancestral polymorphism.  
659 *Mycologia* **97**, 269–285 (2005).
- 660 79. Stanke, M., Diekhans, M., Baertsch, R. & Haussler, D. Using native and syntenically  
661 mapped cDNA alignments to improve de novo gene finding. *Bioinformatics* **24**, 637–  
662 644 (2008).
- 663 80. Jones, P. *et al.* InterProScan 5: genome-scale protein function classification.  
664 *Bioinformatics* **30**, 1236–1240 (2014).
- 665 81. Lowe, T. M. & Chan, P. P. tRNAscan-SE On-line: integrating search and context for  
666 analysis of transfer RNA genes. *Nucleic Acids Res.* **44**, W54–7 (2016).

- 667 82. Yang, Z. & Nielsen, R. Synonymous and nonsynonymous rate variation in nuclear  
668 genes of mammals. *J. Mol. Evol.* **46**, 409–418 (1998).
- 669 83. Guéguen, L. *et al.* Bio++: Efficient Extensible Libraries and Tools for Computational  
670 Molecular Evolution. *Mol. Biol. Evol.* **30**, 1745–1750 (2013).
- 671 84. Paradis, E. & Schliep, K. ape 5.0: an environment for modern phylogenetics and  
672 evolutionary analyses in R. *Bioinformatics* **35**, 526–528 (2019).
- 673 85. Felsenstein, J. Phylogenies and the comparative method. *Am. Nat.* **125**, 1–15 (1985).
- 674 86. Revell, L. J. phytools: an R package for phylogenetic comparative biology (and other  
675 things). *Methods Ecol. Evol.* **3**, 217–223 (2012).
- 676 87. Steenwyk, J. L. & Rokas, A. Treehouse: a user-friendly application to obtain subtrees  
677 from large phylogenies. *BMC Res. Notes* **12**, 541 (2019).
- 678

679 **Acknowledgments**

680 We thank members of the Rokas and Hittinger labs, especially members of the Y1000+

681 Project for constructive feedback.

682

683 **Funding Statement**

684 This work was conducted in part using the resources of the Advanced Computing Center for

685 Research and Education (ACCRE) at Vanderbilt University. X.X.S. was supported by the

686 start-up grant from the “Hundred Talents Program” at Zhejiang University and the

687 Fundamental Research Funds for the Central Universities (No. is appending). X.Z. was

688 supported by the National Key Project for Basic Research of China

689 (973 Program, No. 2015CB150600) and the open fund from Key Laboratory of Ministry of

690 Education for Genetics, Breeding and Multiple Utilization of Crops, College of Crop Science,

691 Fujian Agriculture and Forestry University (GBMUC-2018-005). M.G. was supported by the

692 Royal Netherlands Academy of Arts and Sciences. C.T.H. was supported by the National

693 Science Foundation (DEB-1442148), the USDA National Institute of Food and Agriculture

694 (Hatch Project No. 1020204), in part by the DOE Great Lakes Bioenergy Research Center

695 (DOE BER Office of Science No. DE-SC0018409), the Pew Charitable Trusts (Pew Scholar

696 in the Biomedical Sciences), and the Office of the Vice Chancellor for Research and Graduate

697 Education with funding from the Wisconsin Alumni Research Foundation (H. I. Romnes

698 Faculty Fellow). J.L.S. and A.R. were supported by the Howard Hughes Medical Institute

699 through the James H. Gilliam Fellowships for Advanced Study program. A.R. was supported

700 by the National Science Foundation (DEB-1442113), the Guggenheim Foundation, and the

701 Burroughs Wellcome Fund.

702

703 **Author contributions**

704 Study conception and design: X.X.S., C.T.H., A.R.; Acquisition of data: X.X.S.; Analysis

705 and interpretation of data: X.X.S., J.L.S., A.L.L., D.A.O., X.Z., J.K., Y.L., M.G., C.T.H.,

706 A.R.; Drafting of manuscript: X.X.S., A.R.; Critical revision: all authors.

707

708 **Competing interests**

709 The authors declare no competing financial interests.

## 710 **Figure Legends**

### 711 **Fig. 1 Maximum likelihood (ML) phylogeny of 1,107 taxa in the fungal phylum**

712 **Ascomycota.** The concatenation-based ML phylogeny ( $\ln L = -269043834.145$ ) was inferred  
713 from a set of 815 BUSCO amino acid genes (total 56, 2376 sites) under a single LG + G4  
714 substitution model using IQ-TREE multicore version 1.5.1. The number of species sampled  
715 in each subphylum is given in parentheses. Internal branch labels are acronyms for 12 major  
716 clades in the subphylum Saccharomycotina and 9 classes in the subphylum Pezizomycotina.  
717 The bar next to each species indicates the guanine-cytosine (GC) content. On average,  
718 lineages in the subphylum Saccharomycotina have significantly lower GC content (49.6% vs.  
719 40.6%; Wilcoxon rank-sum test;  $P$ -value =  $3.07 \times 10^{-103}$ ) but higher evolutionary rate (1.80  
720 substitutions per site vs. 1.12 substitutions per site; Wilcoxon rank-sum test;  $P$ -value =  $6.57 \times$   
721  $10^{-126}$ ) compared to lineages in the subphylum Pezizomycotina. The complete phylogenetic  
722 relationships of 1,107 taxa are given in Supplementary Fig. 2 and in the Figshare repository.  
723 For easy determination of the relationships among any subset of taxa, the phylogeny is also  
724 available through Treehouse<sup>87</sup>.

725

### 726 **Fig. 2 Distribution of phylogenetic signal for three historically contentious relationships**

727 **within Ascomycota.** For each relationship / internal branch (**a**: which class(es) is the sister  
728 group to the rest of the Pezizomycotina?; **b**: what is the relationship among three classes  
729 Schizosaccharomycetes, Pneumocystidomycetes, and Taphrinomycetes in the subphylum  
730 Taphrinomycotina?; **c**: what is the relationship among three subphyla Pezizomycotina,  
731 Saccharomycotina, and Taphrinomycotina in the phylum Ascomycota?), we applied the

732 framework presented by Shen et al.<sup>40</sup> to examine proportions of genes (left panel) and sites  
733 (right panel) supporting each of three competing hypotheses (topology 1 or T1 in red,  
734 topology 2 or T2 in green, and topology 3 or T3 in yellow). Note that both concatenation- and  
735 coalescent-based approaches supported T1 in our study. Dashed horizontal lines on 1/3 y-axis  
736 value denote expectation of proportion of genes / sites under a polytomy scenario. The *G*-test  
737 was used to test if the sets of three values are significantly different (\*\*\*:  $P$ -value  $\leq 0.001$ ).  
738 All values are given in Supplementary Tables 4 and 5. Input and output files associated with  
739 phylogenetic signal estimation are also deposited in the Figshare repository.

740

741 **Fig. 3 Contrasting patterns for seven genomic properties between Pezizomycotina and**

742 **Saccharomycotina. a**, For each species in Pezizomycotina (colored in red,  $n=761$ ) and  
743 Saccharomycotina (colored in green,  $n=332$ ), we calculated evolutionary rate, GC content,  
744 genome size, number of protein-coding genes, number of DNA repair genes, number of tRNA  
745 genes, and  $d_N/d_S$  (see the Methods section for details). The Wilcoxon rank-sum test was used  
746 to test if the sets of values in two subphyla are significantly different. **b**, Pairwise standard  
747 Pearson's correlation coefficient among pairs of the seven genomic properties were  
748 conducted using R 3.4.2 for Pezizomycotina (lower diagonal) and Saccharomycotina (upper  
749 diagonal), respectively. For each cell, the top value corresponds to  $P$ -value (NS:  $P$ -  
750 value  $>0.05$ ; \*:  $P$ -value  $\leq 0.05$ ; \*\*:  $P$ -value  $\leq 0.01$ ; \*\*\*:  $P$ -value  $\leq 0.001$ ), whereas the  
751 bottom value corresponds to Pearson's coefficient value. Orange cells denote instances where  
752 correlation trends in Pezizomycotina and Saccharomycotina are in opposite directions,

753 whereas blue cells denote instances where the trends are in the same direction. The detailed  
754 values of all seven properties in Pezizomycotina and Saccharomycotina are given in  
755 Supplementary Table 7. The correlations among these seven properties are largely consistent  
756 before (i.e., standard Pearson's correlations) and after (i.e., phylogenetically independent  
757 contrasts) accounting for correlations due to phylogeny (see Supplementary Table 8).

758

759

760 **Fig. 4 Contrasting modes of genome evolution in Pezizomycotina and**

761 **Saccharomycotina. a**, For each of the seven genomic properties examined (see the Methods  
762 section for details) , we reconstructed them as continuous traits on the species phylogeny  
763 (Fig. 1) and visualized their ancestral states with the R package phytools v0.6.44<sup>86</sup>. Heatmap  
764 bars denote ancestral state values from small (blue) to large (red). Three ancestral state values  
765 next to three red dots are shown for the ancestor of the subphyla Pezizomycotina and  
766 Saccharomycotina, the ancestor of the subphylum Pezizomycotina, and the ancestor of the  
767 subphylum Saccharomycotina, respectively. **b**, Phylogeny key showing the placement of the  
768 21 nodes representing the last common ancestors of the 12 major clades in the subphylum  
769 Saccharomycotina and of the 9 classes in the subphylum Pezizomycotina; the 21 nodes are  
770 indicated by the red dots. The orders of branches in **a** are identical to those in **b**.

771

**Table 1. Summary of values for seven genomic properties in extant Saccharomycotina and Pezizomycotina and in the last common ancestors of Saccharomycotina and Pezizomycotina.**

| Property                                           | Extant Saccharomycotina*<br>(n=332) | Extant Pezizomycotina*<br>(n=761) | Saccharomycotina<br>ancestor | Pezizomycotina<br>ancestor | Difference between<br>two extant lineages | Difference between<br>two ancestors |
|----------------------------------------------------|-------------------------------------|-----------------------------------|------------------------------|----------------------------|-------------------------------------------|-------------------------------------|
| Evolutionary rate (amino acid substitutions/ site) | 1.80                                | 1.12                              | 1.1                          | 0.9                        | 0.68                                      | 0.2                                 |
| GC content (%)                                     | 40                                  | 50                                | 43                           | 47                         | 10                                        | 4                                   |
| Genome size (Mb)                                   | 13                                  | 39                                | 23                           | 42                         | 26                                        | 19                                  |
| No. of genes                                       | 5,734                               | 10,847                            | 7,000                        | 9,400                      | 5,113                                     | 2,400                               |
| No. of DNA repair genes                            | 41                                  | 54                                | 44                           | 52                         | 13                                        | 8                                   |
| No. of tRNA genes                                  | 179                                 | 146                               | 160                          | 170                        | 33                                        | 10                                  |
| $d_N/d_S$                                          | 0.053                               | 0.063                             | 0.052                        | 0.058                      | 0.01                                      | 0.006                               |

\* denote average values.



**Figure 1**

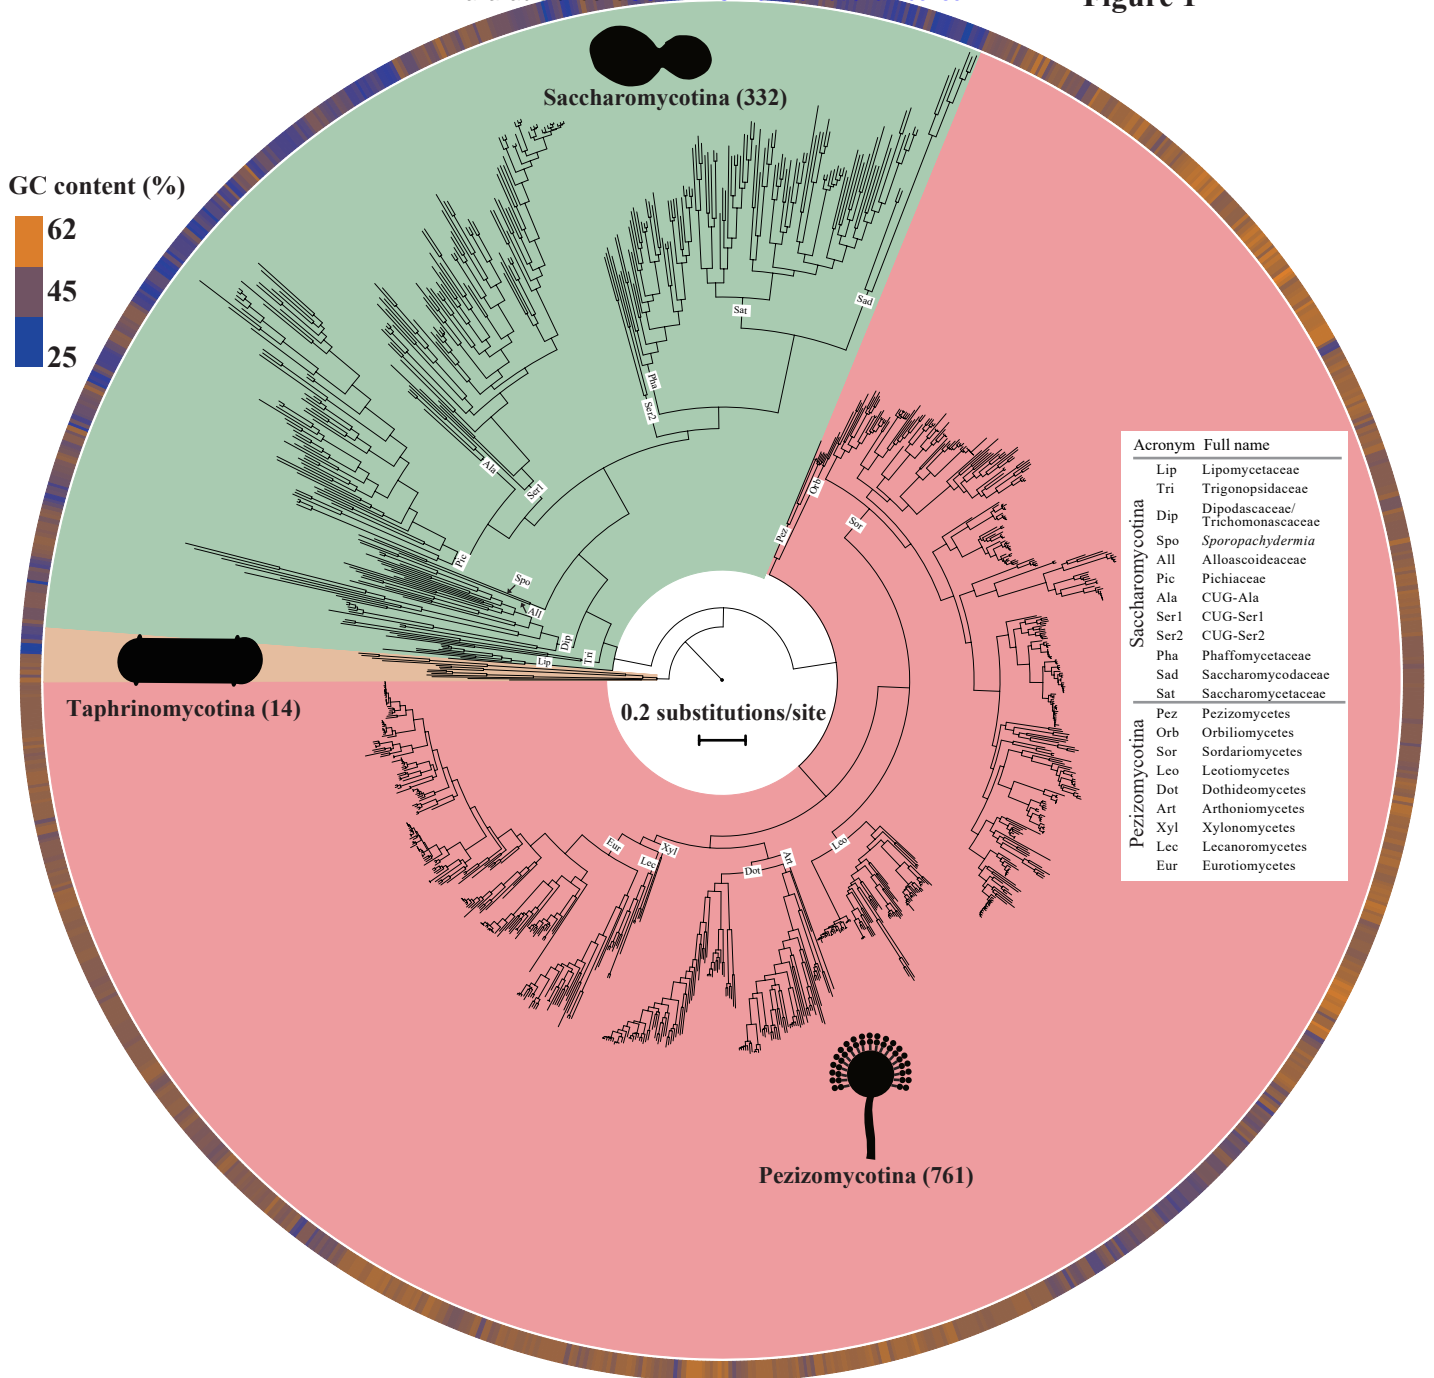

Figure 2

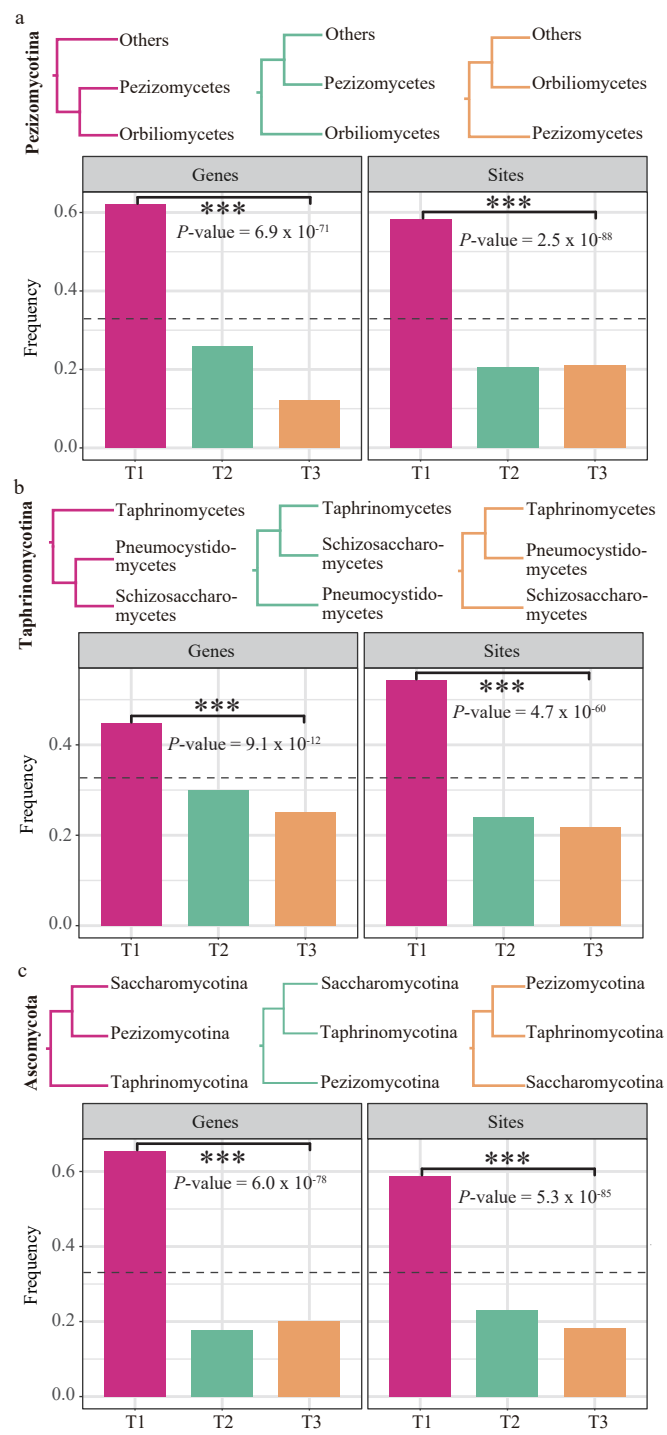

### Figure 3

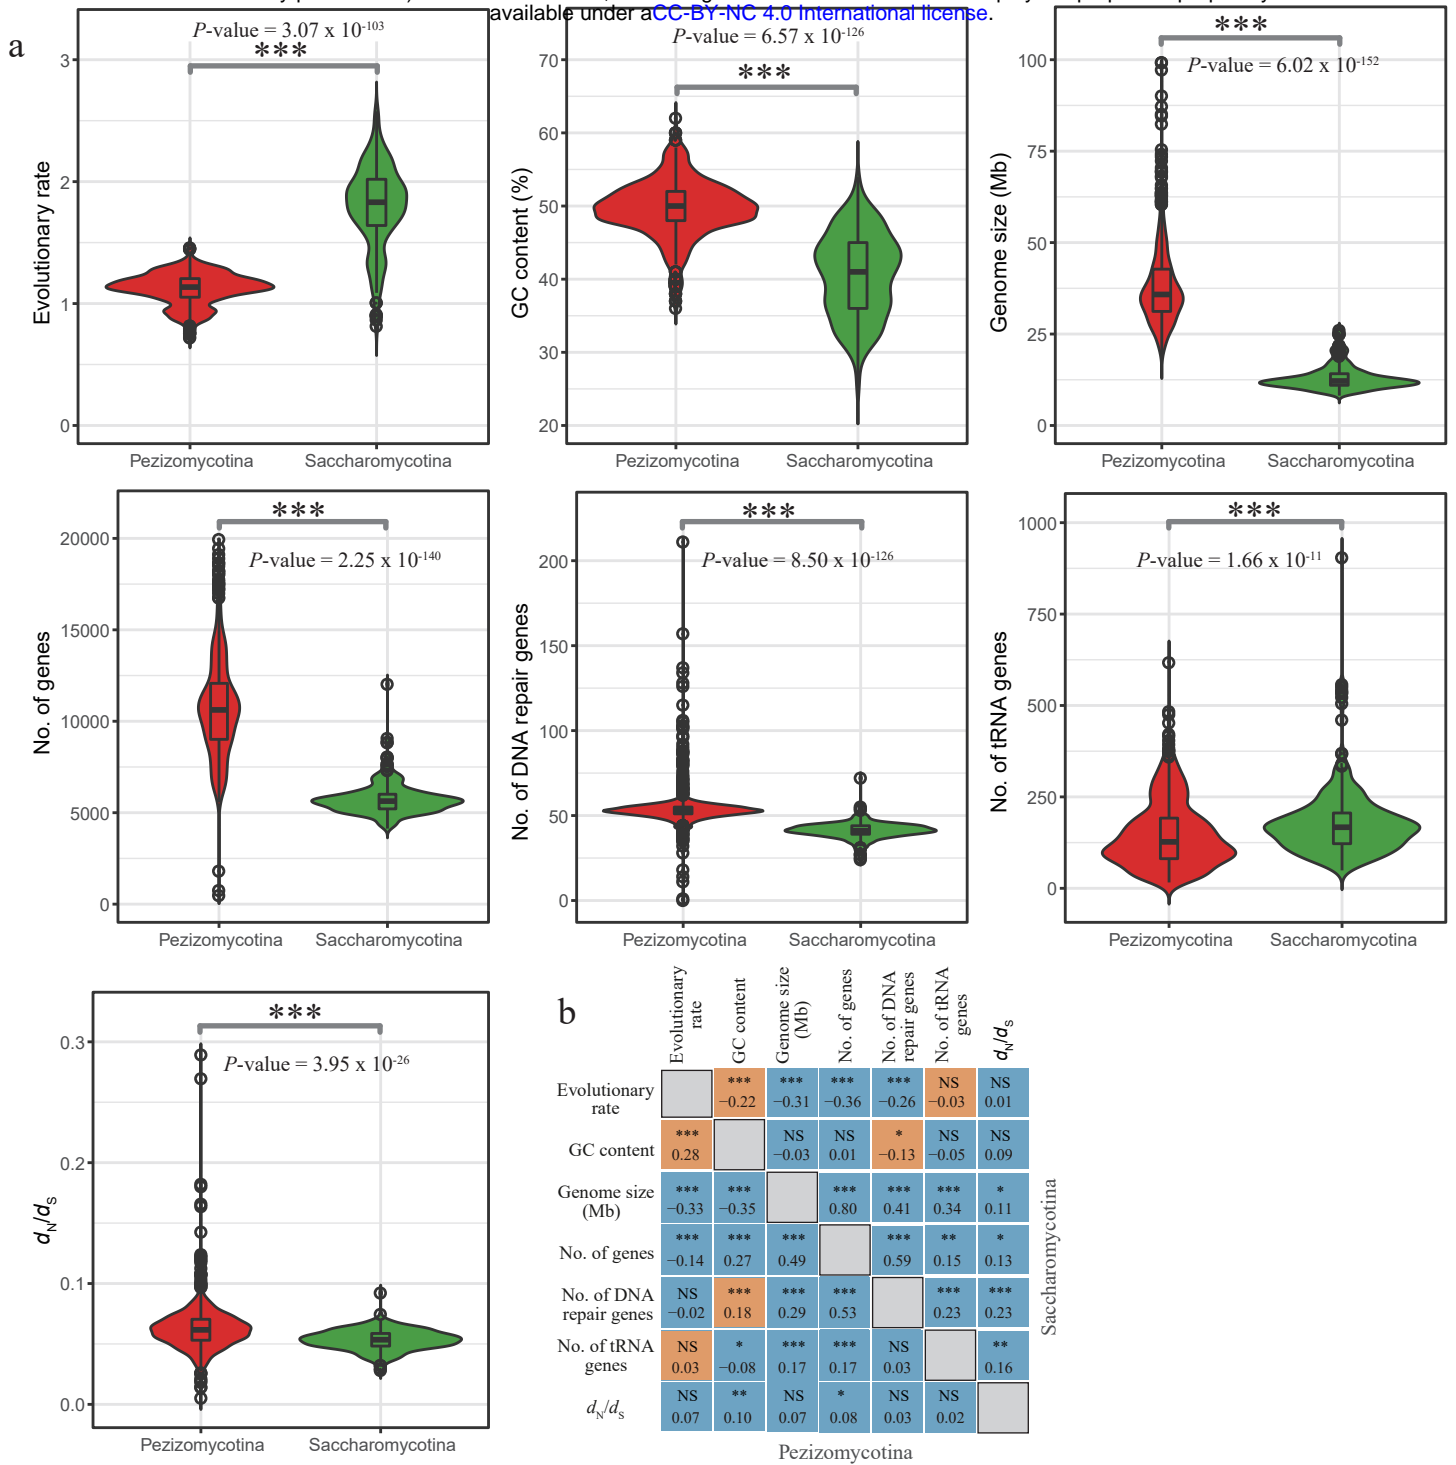

Figure 4

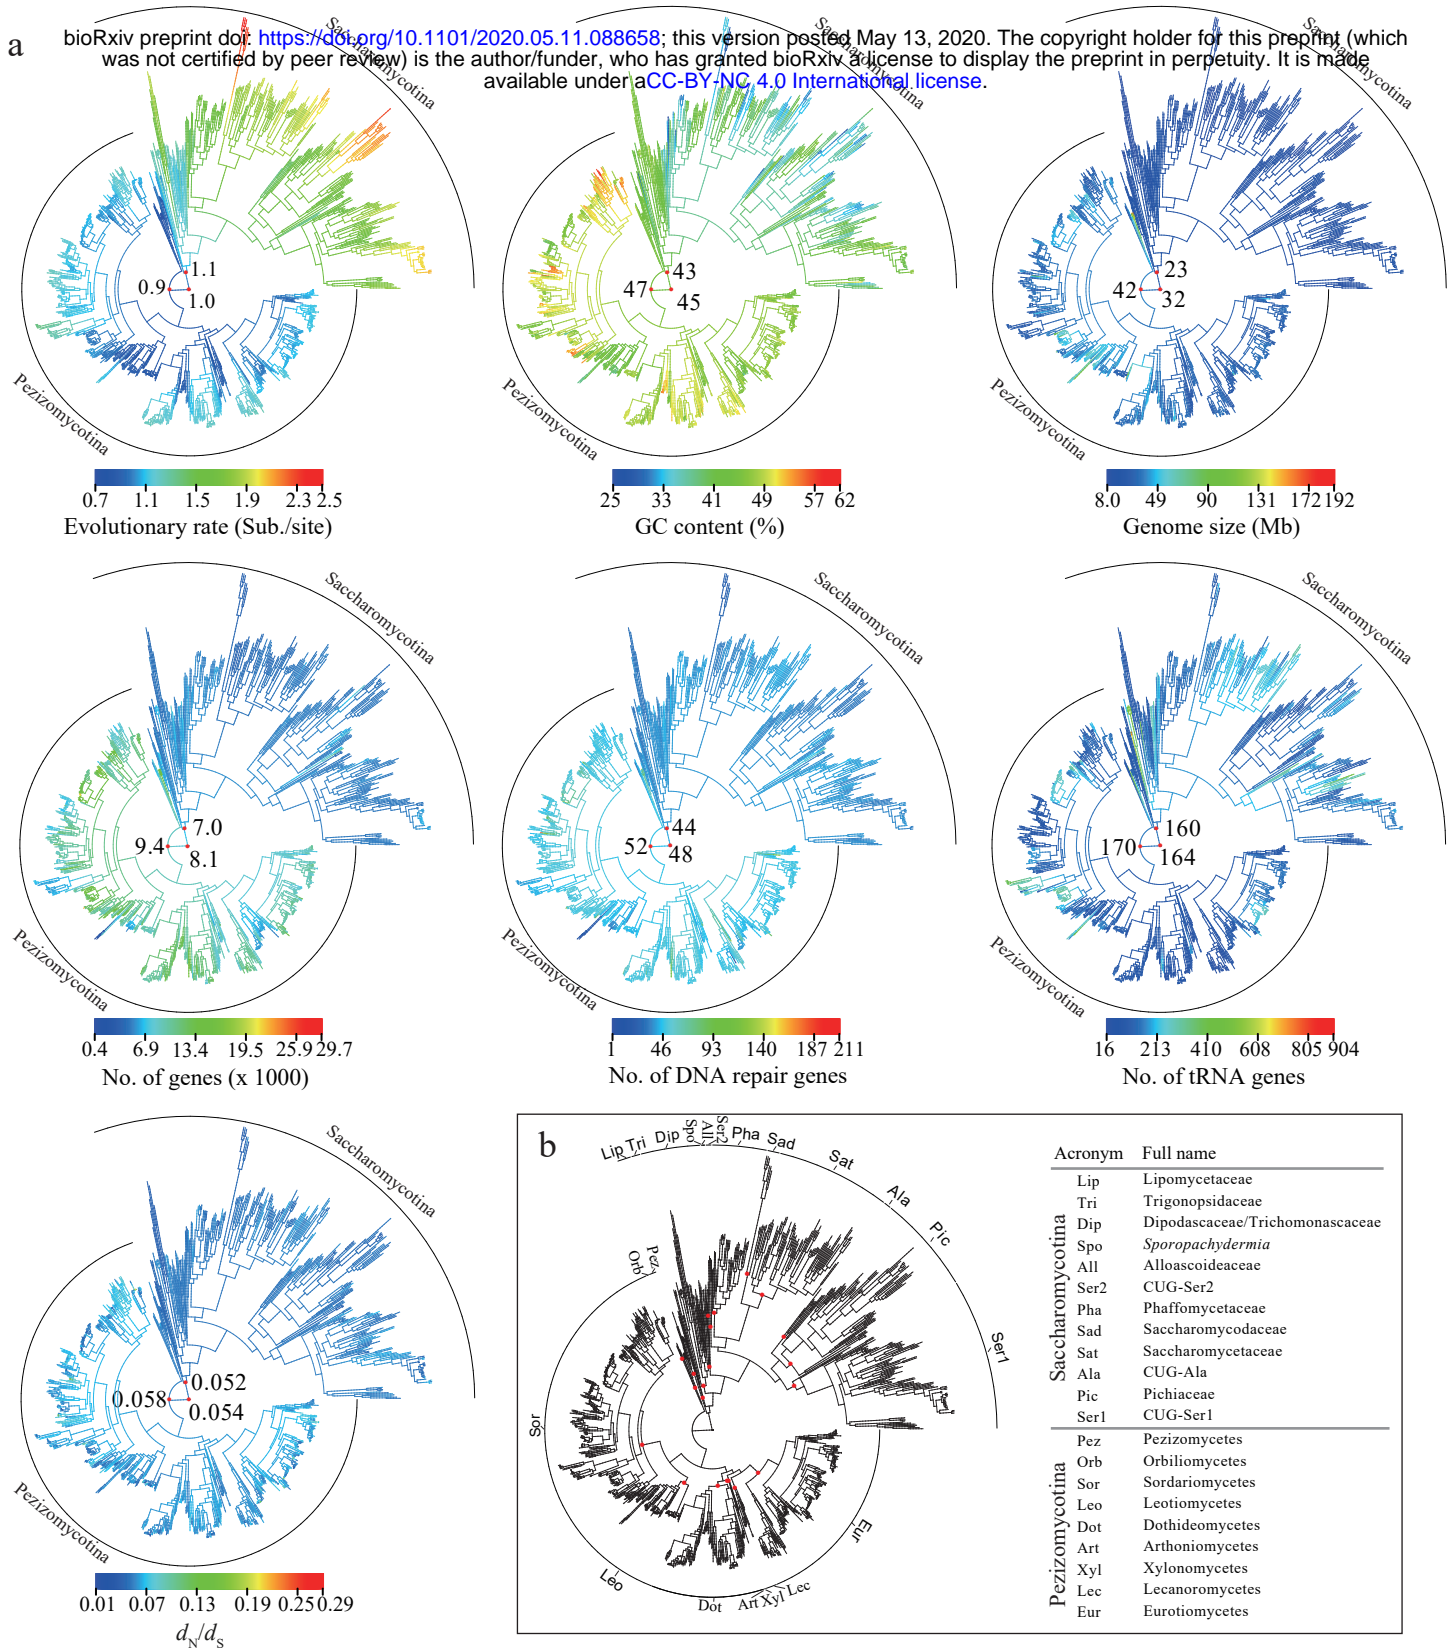

Source: https://www.biorxiv.org/content/10.1101/2020.05.11.088658v1.full.pdf
